# Supplementary material for: Systematic synthesis and analysis of change in morphology, electronic structure and photoluminescence properties of pyrazine intercalated MoO3 hybrid nanostructures
Source: Royal Society of Chemistry journal article supplement (doi:10.1039/c0ce00303d), 2011-01-01
Supplement: c0ce00303d.pdf [file c0ce00303d.pdf]

## Supplementary Information

### Systematic synthesis and analysis of change in morphology, electronic structure and photoluminescence properties of Pyrazine intercalated MoO<sub>3</sub> hybrid nanostructures

S. Rajagopal <sup>a</sup>, D. Nataraj <sup>\*a</sup>, O. Yu. Khyzhun <sup>b</sup>, Yahia Djaoued <sup>c</sup>, Jacques Robichaud <sup>c</sup>,  
K. Senthil <sup>d</sup> and D. Mangalaraj <sup>e</sup>

<sup>a</sup>Thin Films & Nanomaterials Laboratory, Department of Physics, Bharathiar University, Coimbatore – 641 046, India

<sup>b</sup>Department of Structural Chemistry of Solids, Frantsevych Institute for Problems of Materials Science, National Academy of Sciences of Ukraine, 3 Krzhyzhanivsky Street, UA-03142 Kyiv, Ukraine

<sup>c</sup>Laboratoire de Micro-spectroscopies Raman et FTIR, Université de Moncton-Campus de Shippagan, 218, boul. J.-D. Gauthier, Shippagan, NB, Canada E8S 1P6

<sup>d</sup>School of Advanced Materials Science & Engineering, Sungkyunkwan University (Suwon Campus), Cheoncheon-dong 300, Jangan-gu, Suwon 440-746, South Korea

<sup>e</sup>Department of Nanoscience and Technology, Bharathiar University, Coimbatore – 641 046, India

\*Corresponding Author

E. mail: [de.natraj@gmail.com](mailto:de.natraj@gmail.com)

Tel: 91 – 422 - 2428444

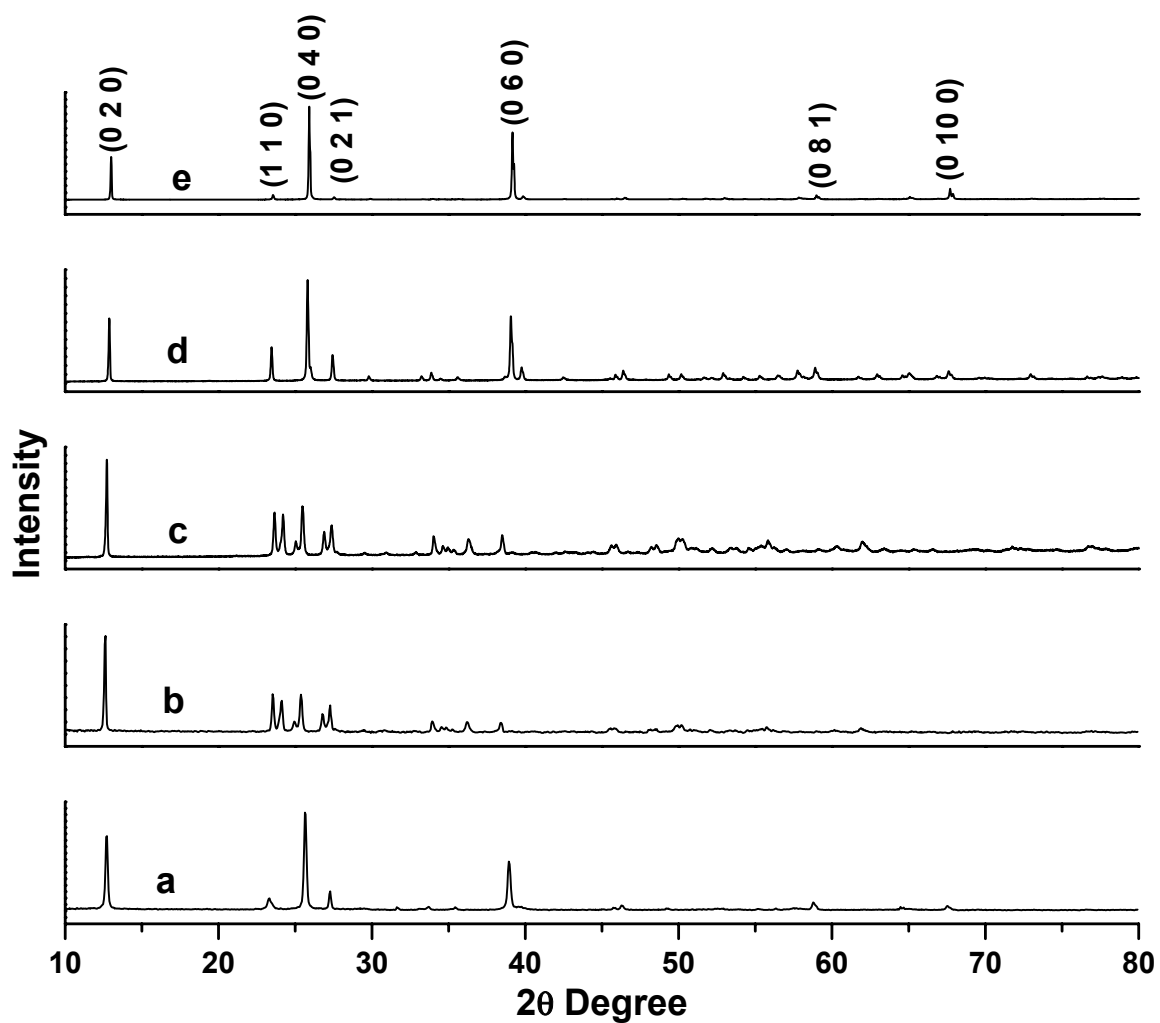

**Fig. S1.** XRD spectra of five different samples; (a) as-prepared  $\text{MoO}_3$ , (b & c) Pyrazine- $\text{MoO}_3$  grown at 6 and 12 h and (d & e) corresponding calcined Pyrazine- $\text{MoO}_3$  at 400°C.
